# Supplementary material for: In-depth investigation of the initiation sites and steps of carbon deposition on CeY zeolites in FCC hydrogen transfer reactions
Source: Royal Society of Chemistry journal article supplement (doi:10.1039/d5cy01260k), 2026-01-01
Supplement: d5cy01260k3.pdf [file d5cy01260k3.pdf]

## Supplementary information

### **In-depth investigating of the Initiation Sites and Steps of Carbon Deposition on CeY Zeolites in FCC Hydrogen Transfer Reactions**

Zhongxing Geng,<sup>\*ab</sup> Yucai Qin,<sup>b</sup> Jianhao Jiao,<sup>c</sup> Zhiqiang Zhang<sup>\*a</sup> and Lijuan Song<sup>\*ab</sup>

<sup>a</sup> School of Chemical Engineering, University of Science and Technology Liaoning,

Anshan, 114051, P.R. China. E-mail: zhangzhiqiang@ustl.edu.cn

E-mail: [gruxing@163.com](mailto:gruxing@163.com)

<sup>b</sup> School of Petrochemical Engineering, Liaoning Petrochemical University, Fushun,

113001, P.R. China. E-mail: [lsong56@263.net](mailto:lsong56@263.net)

<sup>c</sup> College of Chemistry and Chemical Engineering, China University of Petroleum (East China), Qingdao 266555, China.

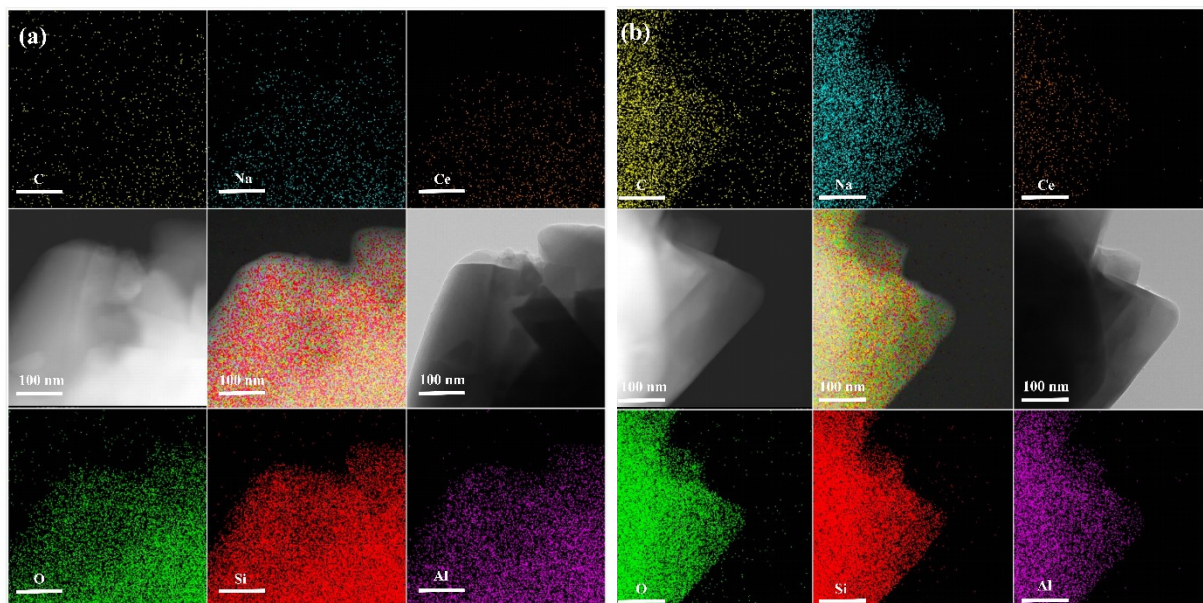

**Fig.S1 TEM/STEM-Mapping images: (a)  $\text{Ce}_{0.01}\text{Y}$ -carbon deposits (b)  $\text{Ce}_{0.075}\text{Y}$ -carbon deposits.**

**Table S1 Comparison of coke selectivity over different catalysts from work and literature.**

| Catalyst                   | Conversion (%) | Coke Yield(%) | Refs         |
|----------------------------|----------------|---------------|--------------|
| $\text{Ce}_{0.01}\text{Y}$ | 68.84          | 13            | Present work |
| NaY(commercial catalyst)   | 15             | 7.5           | Present work |
| HY                         | 26             | --            | [27]         |
| 0.05CeY                    | 35             | --            | [27]         |
| ZSM-5                      | --             | 19.2          | [46]         |
| USHY                       | 58             | 11.5          | [47]         |
| LaY                        | 67.9           | --            | [34]         |
