# Supplementary figures and images for: In-depth investigation of the initiation sites and steps of carbon deposition on CeY zeolites in FCC hydrogen transfer reactions
Source: Royal Society of Chemistry journal article supplement (doi:10.1039/d5cy01260k), 2026-01-01

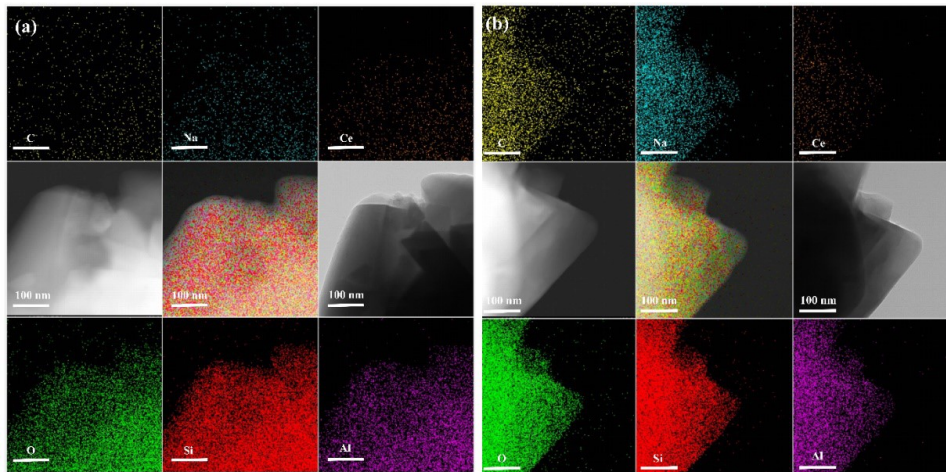

Supplement: d5cy01260k2.pdf [file d5cy01260k2.pdf]
